# Supplementary material for: Satellite DNA in Vicia faba is characterized by remarkable diversity in its sequence composition, association with centromeres, and replication timing
Source: PubMed Central journal article supplement (PMC5895790; doi:10.1038/s41598-018-24196-3), 2018-04-11
Supplement: 41598_2018_24196_MOESM1_ESM.pdf [file 41598_2018_24196_MOESM1_ESM.pdf]

# **Satellite DNA in *Vicia faba* is characterized by remarkable diversity in its sequence composition, association with centromeres, and replication timing**

## **Supplementary Information**

Laura Ávila Robledillo<sup>1,2</sup>, Andrea Koblížková<sup>1</sup>, Petr Novák<sup>1</sup>, Katharina Böttinger<sup>1,2</sup>, Iva Vrbová<sup>1</sup>, Pavel Neumann<sup>1</sup>, Ingo Schubert<sup>3</sup>, and Jiří Macas<sup>1,\*</sup>

<sup>1</sup> Biology Centre of the Czech Academy of Sciences, Institute of Plant Molecular Biology, České Budějovice, 37005, Czech Republic

<sup>2</sup> University of South Bohemia, Faculty of Science, České Budějovice, 37005, Czech Republic

<sup>3</sup> Leibniz Institute of Plant Genetics and Crop Plant Research (IPK), 06466 Gatersleben, Stadt Seeland, Germany

\* corresponding author (macas@umbr.cas.cz)

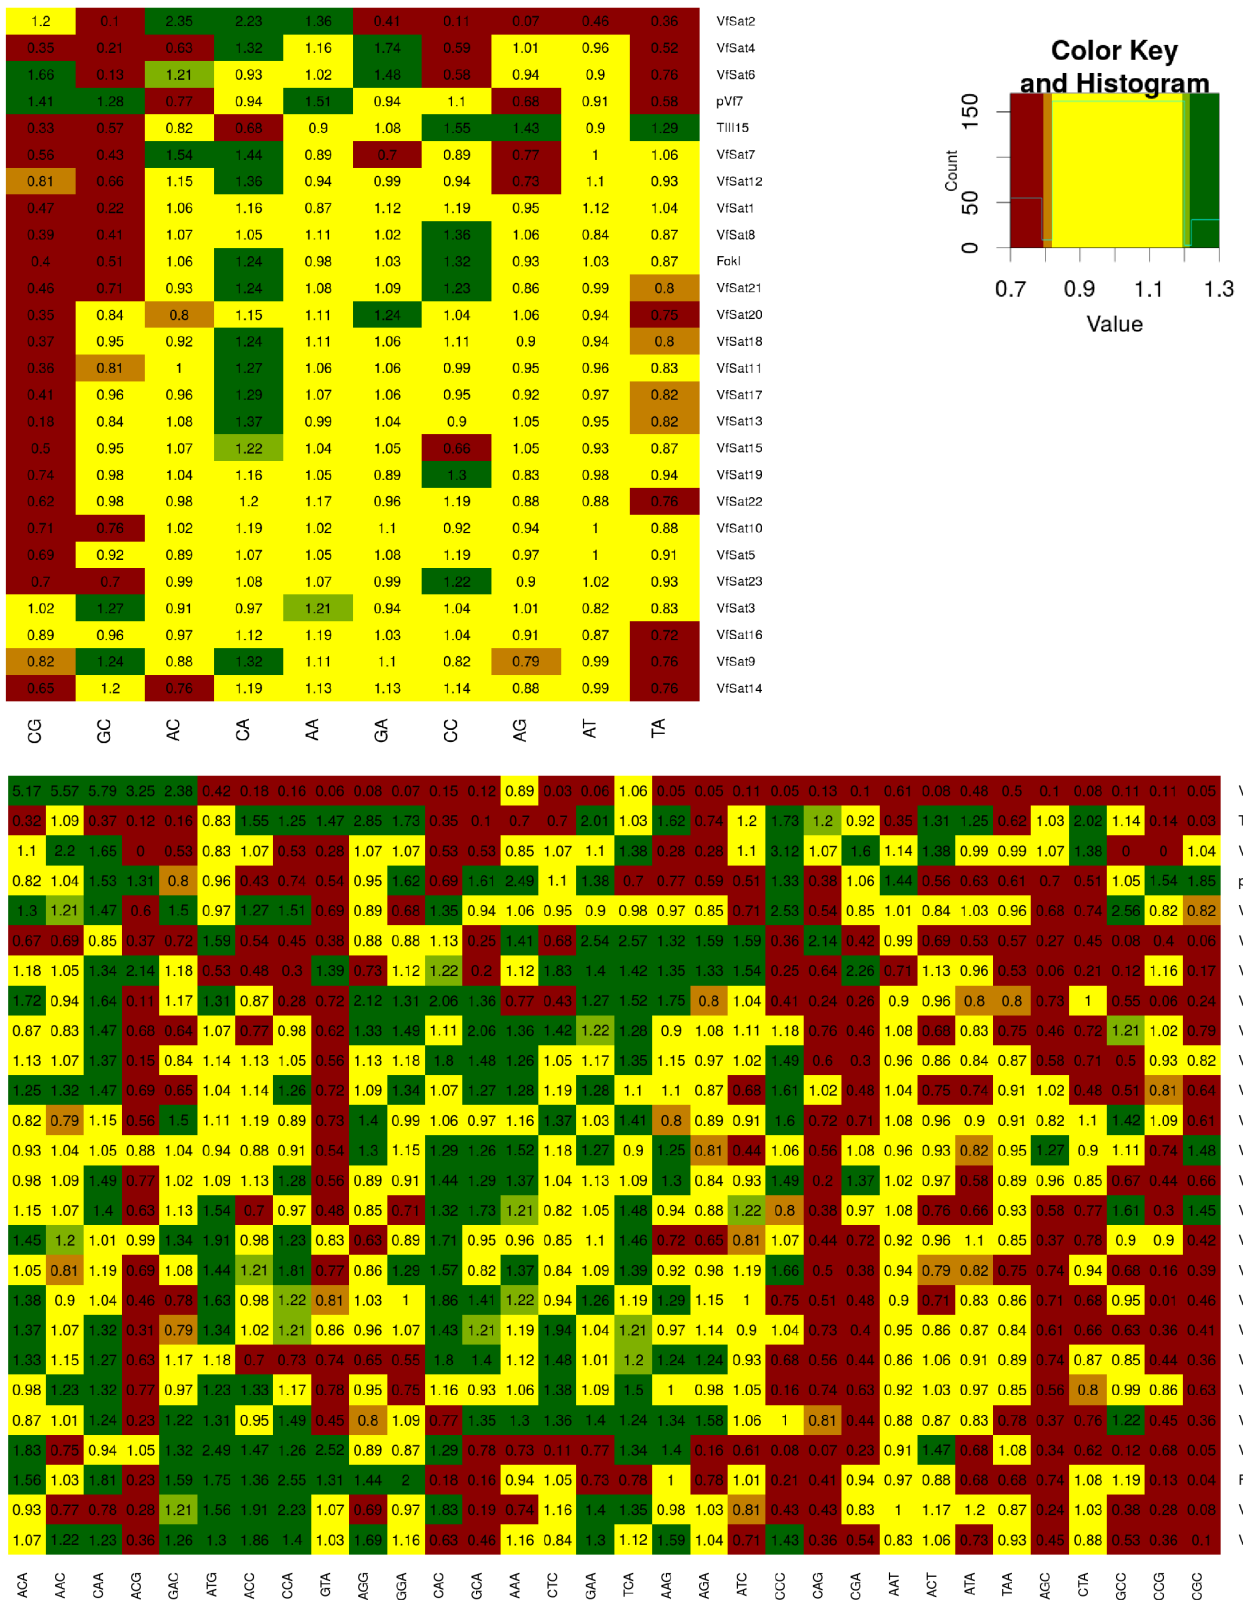

**Figure S1. Frequencies of di- and tri-nucleotides in *V. faba* satellite repeats.** Representation values  $\rho^*_{XY}$  and  $\rho^*_{XYZ}$  for di- and tri-nucleotides respectively were calculated from sequence reads according to Karlin and Burge (1995) and are shown by numeric values and colors of the heatmap. A deviation of  $\rho^*_{XY}$  and  $\rho^*_{XYZ}$  value from 1 reflects marginal (1.20-1.22) or extreme (>1.22) over-representation, or marginal (0.79-0.82) or extreme (<0.79) under-representation.

VfSat4  
VicTR-B  
CTGATGAAATTTGAAGTGAACATAAATCTGAAGAAAAT  
CTGATGAAATTTGAAGTGAATATAAGTCTTCAGAAAAT  
\*\*\*\*\* \*\*

---

VfSat6  
PST\_TR5  
AAGATTTAACACGAACGAGTGTTT-GAATCAATACGGACGAGTAT---CAAAGA  
AATGATTAACACGGACGAGTGTTGAAAATCAATACGGACGAGTATTGACAAAGA  
\*\* \*\*\*\*\* \*\*

---

VfSat1  
PST\_TR9  
CAAATTTTAGGTTACTTCATCACTAAGAACTAAGTT-AAAAGACTATTACTTAATGACA  
CAAATTTTGGTTTCTTCATCACTAAGCAACAAAGTTAAAAAACTATAATAGAATGATT  
\*\*\*\*\* \*\*

VfSat1  
PST\_TR9  
CATATTCATATACATTTGAAATAATTCAAATTATCTAATGAGTCTCGATAGTATATTTA  
CATATTATATATAAATGGGTAACAAGTGAATTACATAATCAATATCAATATTATTTGTA  
\*\*\*\*\* \*\*

VfSat1  
PST\_TR9  
TTCACCATATTCATATTGTATTATGGTATAATAGATGTAACAATTTCAATATTTTTCTT  
TTCGGCATATTCACATTGTATTATGGTATATTATATGTAGATAAATTCATAAAGT---TT  
\*\* \*\*\*\*\* \*\*

VfSat1  
PST\_TR9  
CTTCTCCATCAC  
CTTCTACATCAC  
\*\*\*\*\* \*\*

---

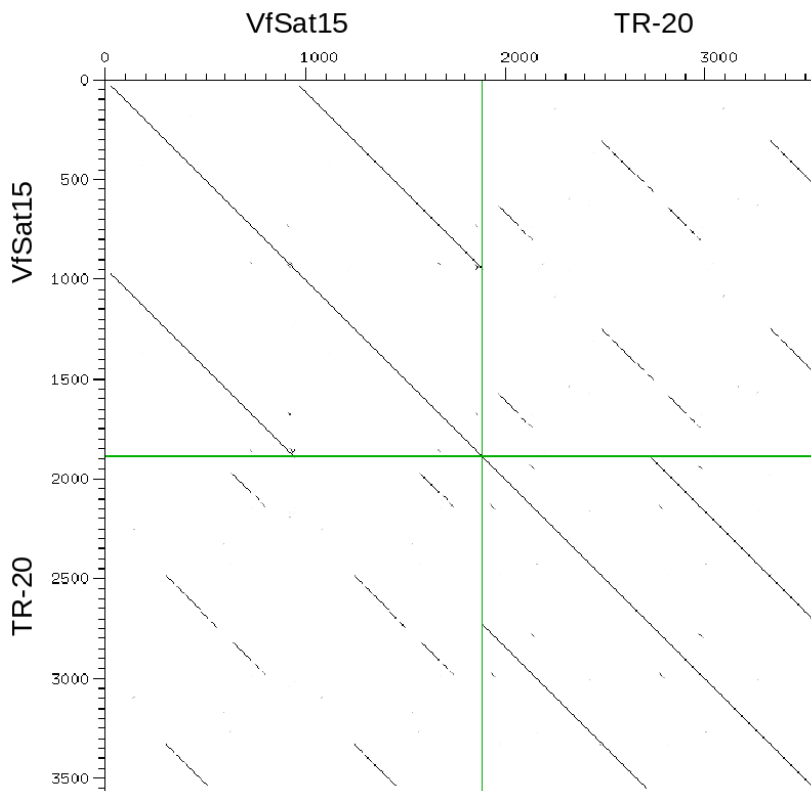

**Figure S2. Sequence similarities of *V. faba* satellites to repeats from *Pisum sativum* (PST\_TR5, PST\_TR9 and TR-20) and *Vicia sativa* (VicTR-B). The similarities are shown as pairwise alignments of consensus monomer sequences, except for VfSat15/TR-20 which are due to long monomers and only partial similarity compared using dot-plot of dimer sequences with similarity threshold of 70 identities over 100 nucleotides.**

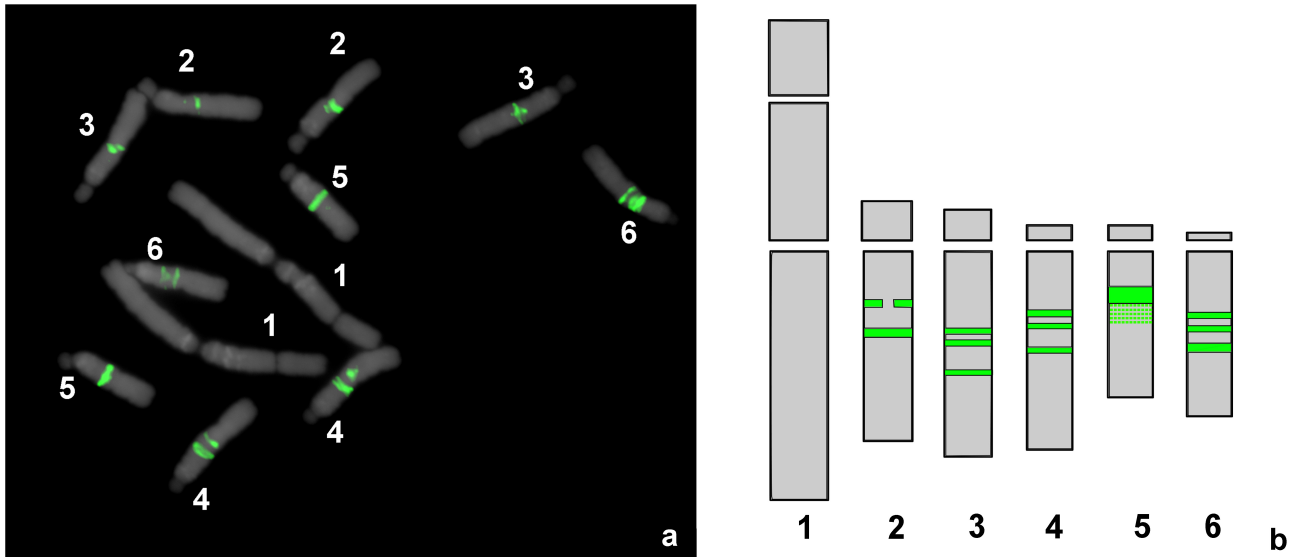

**Figure S3. Discrimination of individual *V. faba* chromosomes based on their morphology and distribution patterns of FokI repeat. (a)** FISH labeling of FokI repeats (green) on metaphase chromosomes. **(b)** Schematic representation of chromosome morphology and FokI patterns. The polymorphic FokI band on chromosome 5 is marked with dotted pattern.

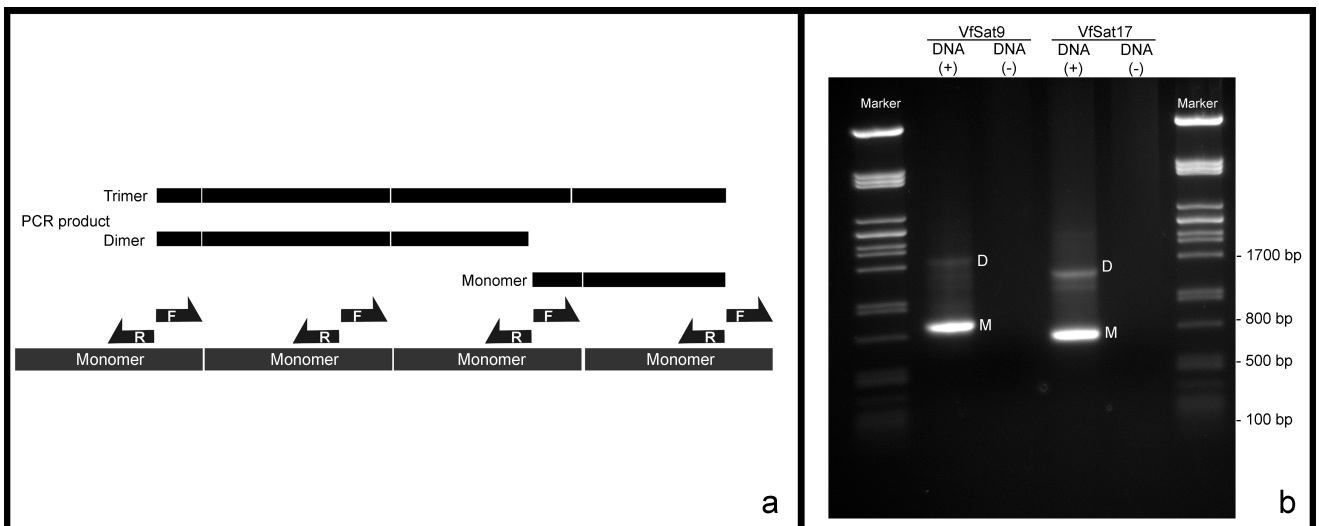

**Figure S4. Design of primers used for PCR amplification of satellite repeats from genomic DNA. (a)** Forward (F) and reverse (R) primers were facing outwards from predicted repeat monomers, thus generating amplification products only when their target sequences were arranged in tandem. **(b)** Example of agarose gel electrophoresis of amplification products from *V. faba* genomic DNA using primers for VfSat9 and VfSat17 repeats, showing bands corresponding to amplified monomer (M) and dimer (D) sequences.

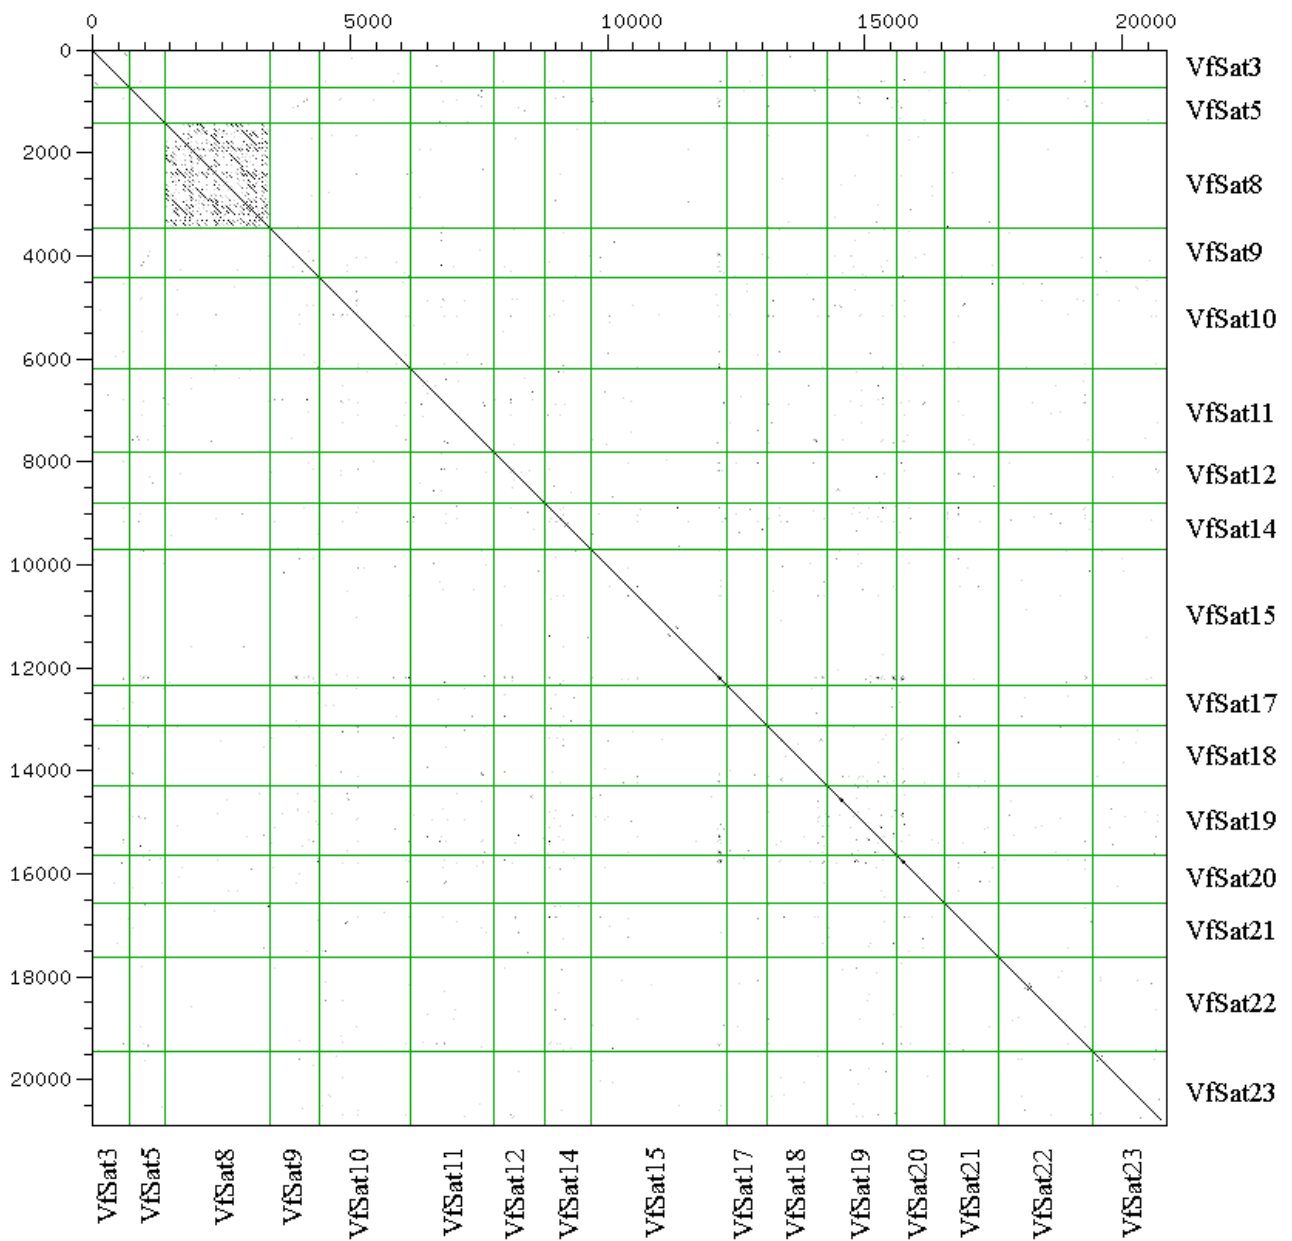

**Figure S5. Dot-plot comparison of satellites with long monomers.** Similarity threshold of 70 identities over 100 nucleotides was employed.

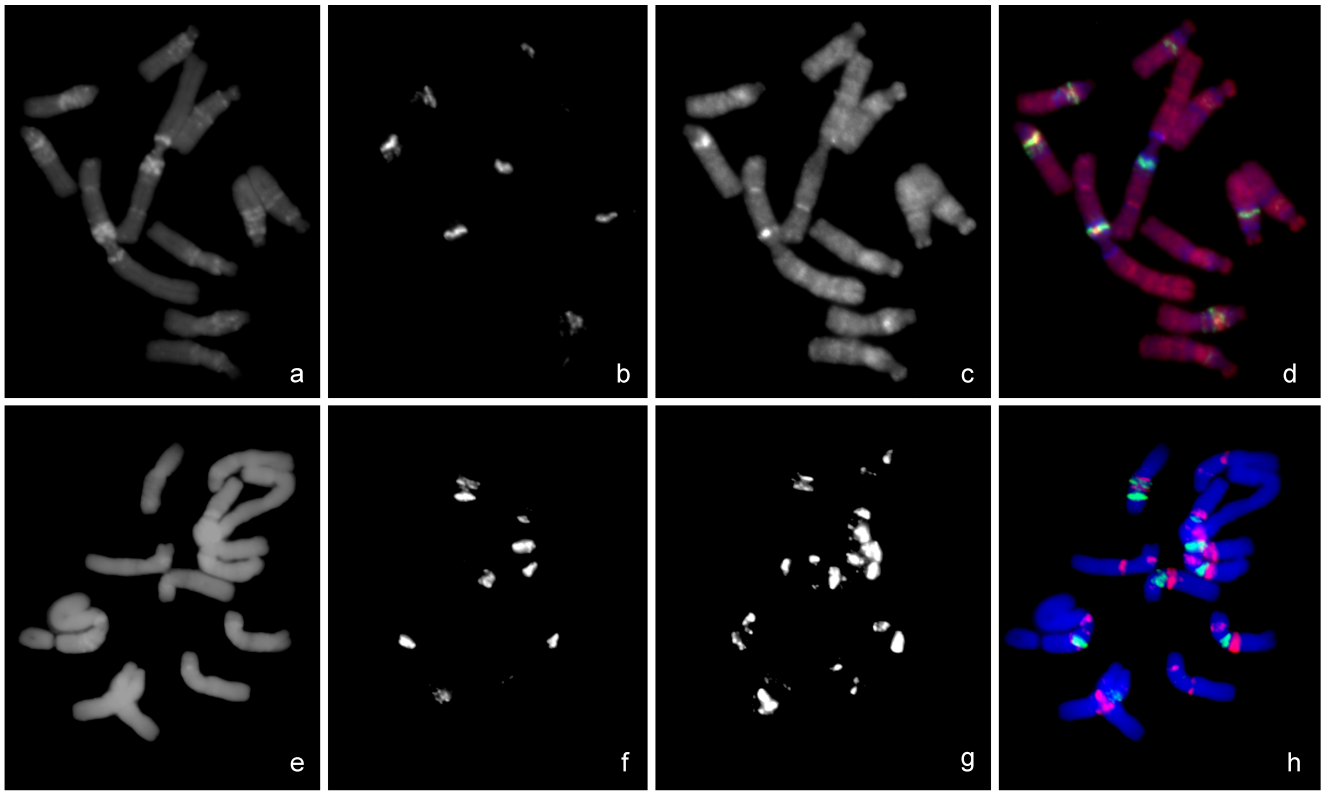

**Figure S6.** Combination of replication assay (EdU labeling, red) showing early (**a-d**) and late (**e-h**) replication patterns with FISH detection of Vfsat2 (green). Chromosomes counterstained with DAPI are shown in blue.

**Table S7.** Replication timing of satellite repeats.

|                                                | Replication time (hours since the start of S phase) |   |   |     |     |     |   |     |     |
|------------------------------------------------|-----------------------------------------------------|---|---|-----|-----|-----|---|-----|-----|
|                                                | 1                                                   | 2 | 3 | 4   | 5   | 6   | 7 | 8   | 9   |
| VfSat2 included in dispersed labeling pattern* | +                                                   | + | + | +   | (+) | (+) | - | -   | -   |
| Centromeric satellites                         | -                                                   | - | - | (+) | +   | +   | - | -   | -   |
| VfSat1                                         | -                                                   | - | - | -   | (+) | +   | + | -   | -   |
| All remaining satellites                       | -                                                   | - | - | -   | -   | (+) | + | (+) | -   |
| FokI                                           | -                                                   | - | - | -   | -   | (+) | + | (+) | (+) |

\* VfSat2 did not replicate during late S phase (hours 7-9) but its exact replication timing was not determined due to the lack of distinct patterns on the background of dispersed labeling during early/mid S phase

**Table S8.** Sequences of oligonucleotide FISH probes.

| ID     | Probe        | Label       | Sequence 5'→3'                                          |
|--------|--------------|-------------|---------------------------------------------------------|
| VfSat1 | VFBm2H1      | Biotin      | CTTTAACTTAGTTTCTTAGTGATGAAGTAACCTAAAATT<br>TGGTGATGGA   |
| FokI   | VFBm3_Fok_H1 | Fluorescein | CTACCTTCCATAATGACAAGGCTACCATCCATTGGAGTAA<br>CAAAAATCTC  |
| VfSat2 | VFBm15H1     | Biotin      | CAACAACAACAACAACAACGTCAAATAACAACAACAA<br>CAACAACAAC     |
| VfSat5 | VFBm105H1    | Biotin      | AGCTCCCATCATCCAAGTAGGTAGTGCTATCTCACTCCT                 |
| pVf7   | pVF7_TA_CL34 | Biotin      | TAAACCGAGGGCTTGTCGAAACGCTACGAAACTTTGGG<br>GACACTCTCAAT  |
| VfSat6 | VFBm127H1    | Biotin      | ATCAAAGAAAGGTTTAAACACGRACGAGTGTTTGAATCA<br>ATACGGACGAGT |

**Table S9.** PCR primers used for amplification of satellite repeats from genomic DNA and GenBank accession numbers of cloned probes.

| Satellite | Primer        | Sequence 5'→3'                    | Accession number |
|-----------|---------------|-----------------------------------|------------------|
| VfSat3    | Vf_TA_CL39_1  | AGCACGAATAAAACTAAAGTTC            | MF796528         |
|           | Vf_TA_CL39_2  | TACTTTTGAAGTGAAATGGAG             |                  |
| VfSat4    | VFBm102c102F  | GCAGAAAATCTGATGAAAAATGATG         | MF796529         |
|           | VFBm102c102R  | TTGTTCACTTCAAATTTTCGTCAG          |                  |
| VfSat7    | VFBm144c57F   | TACCATAATGAATGGACCTTTATACT        | MF796530         |
|           | VFBm144c57R   | CGTTACATATTTTGACTAAGTACTTTTAATATG |                  |
| VfSat8    | VFBm164c16F   | CTAATCATGTTATGTCTCATGTAGTTTC      | MF796531         |
|           | VFBm164c16R   | GAAATGTTAATATCTTGTTAATCAAAGACT    |                  |
| VfSat9    | VFBm168c23F   | CTATTTTCAAATGTATATTCGACATGC       | MF796532         |
|           | VFBm168c23R   | TAGGCCTTTTAGAATCAGTTATTGACA       |                  |
| VfSat10   | VFBm186c4F    | AGGAAACAAATAACATTGCATTCTC         | MF796533         |
|           | VFBm186c4R    | ATTTTACCCTCTCTACAAAGATTGAT        |                  |
| VfSat11   | VFBm187c11F   | CCAAAACAATAACAACAACATCAA          | MF796534         |
|           | VFBm187c11R   | CTTATGTTGTTTAGCGACATTGGA          |                  |
| VfSat12   | VFBm190c10F   | TGTGTTTCAGTTCAAATGTGTGTCT         | MF796535         |
|           | VFBm190c10R   | AAATGTGAGATAACAACACTACGGACA       |                  |
| VfSat13   | VFBm197C23F   | GGTTATAAAACAACAAGCAAAGTAAG        | MF796536         |
|           | VFBm197C23R   | CCTTGCATGTTTCCCTTTAT              |                  |
| VfSat14   | VFBm198c11F   | CTCTCTGTTCAATTTCTCAATCGTC         | MF796537         |
|           | VFBm198c11R   | GATTATATCTGCGAATGCCTGAA           |                  |
| VfSat15   | VFBm199F      | TGAGAAGTCGTCCATCCTGA              | MF796538         |
|           | VFBm199R      | TTGCACAAAGAGAACTTAAGGAA           |                  |
| VfSat16   | VFBm200C23F   | ATCAAATTAGTTGGGGCTTG              | MF796539         |
|           | VFBm200C23R   | TTCGGCAATCGTAATCAAC               |                  |
| VfSat17   | VFBm205c11F   | GGTATGAGAATGGTGTATCTTTTATCA       | MF796540         |
|           | VFBm205c11R   | AGAAAAGATATTTGGTTTCGAATGA         |                  |
| VfSat18   | VFBm207c9F    | AAGATTCATCGGAAGTATTCCTTTT         | MF796541         |
|           | VFBm207c9R    | GAGAAATCACTTTGTAAAGAATTTGGA       |                  |
| VfSat19   | VFBm220c12F   | TTCTGCACAAGTAAATGAATGGTTAT        | MF796542         |
|           | VFBm220c12R   | GGTTGAAGCCACTTATAAATCTCAA         |                  |
| VfSat20   | VFBm224c8F    | ACTGGGCAGAAAAATGAGACTTA           | MF796543         |
|           | VFBm224c8R    | TTCAACTTTGCAAAAGGGGTTA            |                  |
| VfSat21   | VFBm233c2F    | CACACTATTGTAATCTCCTTGCAAAT        | MF796544         |
|           | VFBm233c2R    | ACAAAATGGGGTAGCATGGA              |                  |
| VfSat22   | VFBm237c7F    | TCAAATAGGACAACGTATTTAAGCAA        | MF796545         |
|           | VFBm237c8R    | TAATGCAGTGTGTCAATGTTGG            |                  |
| VfSat23   | Vf_TA_CL281_2 | TAACCCAAGAGGACCCAATG              | MF796546         |
|           | Vf_TA_CL281_1 | GATACCTTCCTCACCCATACA             |                  |



## Supplementary Data S10 - Reconstructed monomer sequences

>VfSat1\_TA

CATACCCAAATTTTAGGTTACTTCATCACTAAGAACTAAGTTAAAAGACTATTACTTAATGACACATATCCATATACATTTGAAATAAT  
TCAAAATTAATGAGTCTCGATAGTATATTTATTCACCATATTCATATTGTATTATGGTATAATAGATGTAAACAATTTCAATATTTTT  
CTTCTTCTC

>FokI\_TA

TCCATCGGAGTAACAAATCTCAACAACGAACATCTCCATAATGACGAGACTACCA

>VfSat2\_TA

TTTATTTGACGTTGTTGTTGT

>VfSat3\_TA

TAATAACTAAAAAGGAGGCAAACCTAAATTGGTGGGTGTAATGAAATTTTCGCACAAACAGTAGCGTAGGTCCAATAAACGCTTTGTCAAC  
ACCAAGTATTTTTCTCGAAATCAAACCATTTTTCAAATATTTTCATAACAAATGCACTCGAAGGACACATGCATTAAGTAGTGAAGAAGGA  
ATGATTAATGTATGTCCCTTTGTTCTTAGTCCGACGACGCTGGCTGTATAGGTTATCGTTCGAATGCTCACCTCACTCATGAACCTTAG  
TTTTATTCGTGCTATATACTTTTGAAGTAAAATGGAGGAAAATGACTAGTTAGGCGTATGCTCCTTTATAAAGATTCTAATAAAGACAAA  
GAAGAGTGATCTCTTCTGTCCAAAAGGGTAAACCACTTTGAAAGAGAAAATAGAGCAACAGACAATATGCCATAAAAAGTTATTTAATAGC  
ACTTTCTTTTGTGTTTGTATAGCGCTGAAAAGCGCTATTAACCGTGCCACTAATGTGAACGATTTTGTAAATAGCACTTTAAAAGAGCTAT  
TAAAGTACTAGTTTTTAATATAAAAATAATAATTAATAAACAATAACTAATAAGGAGGCAAACGAAATTTGTTAGGAAAATGAATATT  
TTTTCATAAACAATAGCGTCGGCTGAACCGTCGCTAATATAAAAAATAAATAATTATTTAAAA

>TIII15\_TA

TACTTCGAAATGAAAGCCTGGATAGTAGGGCTGTGAGAAGGAACCTGGATAGTAGGGT

>VfSat4\_TA

CTGATGAAATTTGAAGTGAACATAAATCTGAAGAAAAT

>VfSat5\_TA

GTCATGATAGTGAATGGCTATTTCTATAGTTAATGTAATATTTAGTTTATAAATAAATAATTATATCATATTTTCGTTTACGGCCTA  
ATTTTGTTCATTAACATAAAGGACTTAGTTAGAATTGAGTTTGATTAATAAATGAATGAGTAAAAGTATGTATGTTTAAAGTATTTAAG  
TTTGATTTTTATTTGTGAGATTTATATTTTGTGTTTAAATAAATATAAAAATGCTTTTGAGTAAATAACGATTAATTTAGATAGT  
AATTTAAATTTCAAATTTAAATACTATCATTATAGTCAAACTTGATTGAGGGTGAAAAATAAATTAATTCAGCATATTTATTCTCATT  
GATTTTTCAATTTGTCAATTTATTTAACATTACTTGAATTTGTTAATTTACAATGTTTAAAGTGAATAGACTTTTATATAGGTTTGTAGGC  
TAATCAGACATTAATAAATGACTAGGCTCAGATCTACAATAAGCTTATAATAGATTACCGTTTCATACTTTACATCCTTTATAGATTTAGA  
ATTTTTTAGCTCCCATCATCCAAGTAGGTAGTGCCTATCTCACCTTCGAATTTTTTATTCTTGATATGTGAAAGTCATTAGTATAAT  
TTATCATTATTGAAAAATAAGTCACCTCTCTTTATAATTTGAATCTTCATATGACAG

>pVf7\_TA

GAAATTCAAAATAAACCGAGGGCTTGTCGAAACGCTACGAACTTTGGGGACACTCTCAATGTGTTATTTGAGATGTCCATGCAAAAAATC  
AGCAGGAGATTATTTTCTAAGGCGCGTTTGCCCTCCGCTTCCGTTTTTGGCAAAAACGCAATTGCACGCGTACCGTCG

>VfSat6\_TA

AAGATTTAACACGAACGAGTGTGTTGAATCAATACGGACGAGTATCAAAGA

>VfSat7\_TA

ATGTACATTGATGAATGAACCTTTACACTAAGTCAAAGTATGTA

>VfSat8\_TA

CGATAAGGTTTAAATCCTTTCAAATACTCATAGTATGTATAATATTCCTTTCTTTTCATTAGGTTTATTATGGTTTGAATTAAGCTTAAAT  
GGGACAGGCTTTCAAATGCTTATACAATGTAACATAGTTTCTTTCTTTAATTGGTTTTTAAATGACCGAGTATTTGGTCAACATGGATC  
GGACCTTTTCAGCAAATCATATTATGTAATCTACTTCTTACATGTTTATTTATTTCTTTTCGATTTAGTCTTTGATCAAGAAGCGTTTCTAT  
TTTCAACTACTAATTTTATAAGATGCATTTATTTAGTCATCTTTTATGTTACTAATTTACTAGGTTTATCCATCAAGGAATGAATATTTCA  
ACTACTCAAATCATGTAATGTACTTTATTTCCTAATTTGGTTTCCCATGATTATGGCTTTGACCAACCCAGACTAGACATTTCAACTA  
CTCATTGTACGTAATGTACTTATTTATTTTATTTGGTTTATTAGGTTTATGTTTATTAACAAGATATTAACATTTCAACTAATCATG  
TTATGTCTCATGTA  
GTTTCTTACTTTTAGTTGGGTTTTAAGGAATAGGTGTTTGGTCAGTAAAGAAGGTACCTTTGAAATACTCTTAGTATGTAAATCACTTATT  
TTCTCTTCAATTTGCTTCTTTATGGTTGATTCTTGGGTTGATAAGGATTGATTCTTTCAATTAATCATAGTATGTGTAATATTTCTTTTATT  
TCCATTTGGTTTATAATGGTTTGGAGATTTGTTTACATGGAAGGACCTTTAACTACTCTTATTTTATAGTGTAGTTTCTATCTATTTAT  
TTTGATTTTAAATGACTAAGACTCTGACCTTTCAACTCATTATATTAGTTTACTACTTCTTACCTATTTATTTGGTTTCTTACCTTTAAGTC  
TCTGACCAACAAGGGGTTCACTATTCAATTAATGTTATGTAATGATTTCTTTTATCTTTATTTAGTTTCTAATTAAGTCTTTGT  
TCAATTAAGTAAATGACCTTTCAACTTCTCAAAGTTTGAATGTACATTCTTTCTTTTATTTGGACTCTTAATGTAAGTCTTTGATCTAC  
AAGGGTCATACATT  
TCAACTTCTTATTATGTGTAATGTACTATGCTTCTTTAATTGGTTTTTGGGTTATATATATTTTATTAACAAGGTATGAACCTTTTCA  
ACTACACACATAATGTAATGTAGTTTGGTTTCTTTCAATTTGGTTTTCGAAAACATGCTTTTGGTCAATAAAGAAGGAACCTTTTAAATTAAT  
CATAGTATGTAAGCACGATTTTTCTTCAATTTCTTCTTTATGGTCGAGTCTTTGTTTCGATAAGGTTTGTCTATTCAACTGATCATAAT  
ATGTTAATATTTCTTTCTTTTGTATTTGGTTTATGTTTGGTTTAAATCGGGATGGACATTTCAACTACCAATATTTATTTAA  
TTAGTTCTTTCTTTATTTGGTTTTTAAATAACTAAGTCTTTAGTCAACAAGGACCATGTTTCAACAATCATATTATGTAAGTAAAT  
CTTACATGTTTATTTGGTTTCTTATGATTAAGTCGTTGATCAACAAGGATTCTTTTCAACTACAAATGTTATGTAATGTATTTATTTT  
ATCTTCAATTTAGTT



TAAATAAATATTTCTCGTATATCAACATATAAAAATTTTTGTGCATTGAATTTATAGACACACATTTGAACTGAAACACATATCCTTAATT  
AAATGTGAGATAACAACTACGGACATACGACTACATATAACTAGTTATTGCACATTGAAACCAAAGTATTGTTCCATTTATTGCAAATGA  
CATCATAAGTTACACAAGTAATTTTTTTCAGTATTCATACATGTCACCTTATATTCAATTATGATGAACGATATCCAAAGCAAACGTAGTTA  
GAT

>VfSat13\_TA  
TGCTTGTGGTAGGAATACTTATTGTGATGTCTTGATTCACTTTCCTAT

>VfSat14\_TA  
TTTAGAAATCTTCTATATCAAATATGAGTGTACGGGAAATGACTTATTCATTTCCATTATTAATATACATTCTGAAATATTATTATAAAAA  
TAATTATAAAAACTAGCTAAGAAAAACAAAAACAGAGTAAAAAATTGAAAACAATTTGTAACAAGTCACCAATTTAAGAAATTTAAAA  
CATAATATATTTAGATAAAGAACTAATCAAACAAGTCAAAATTTATAACTTAATTAATAAACAATTTATTGTTGTTTGTGTTTTC  
CCTTATTATATTTTTAATTTTTTCTTTCTACCTTTTTTATTCTATGGACGAACCTTTTTTTGTTCACTTATTTTTTTATAACTTTAA  
TTTTGATTTTTACGTTATATTGGATTTAATTGAGATTTTGATATGTGCAATTGCCCTGCCATTTGCGATGGTTTTGATTTTTATGCTATTT  
TAGCTGATGATTTGATATGCAACTTACGTTTATTTTTTTAATTGAATGTGCTTTGAGTATTTTACATATCCTGAAATTGTGATATTTG  
ATAGGATGAGTATCACATTAATTTTTTAAATTTAAACATCACAGGATTTTTGAATGGTACCTCTTTTCAAAGATTTGACAATGAAGAAG  
AGAAAAACAAAATACTAAATAGTAATGCAAAAGATATGCCGGAAGATATTAGGGAGAGAAAGGAGAATTGCCCTATGAAGCAGGTTGGAAG  
TGCATTTGATTGGAATATATTCAATAAAAATAGGACGATTGAGAAATTGAACAGAGAGTAAAATTTAATGCAATTCTAATGATTATATCTGC  
GAATGCCTGAATTTCCATTTTTAGAAAACATAGTATTAAATCTTTAGAAAACATAGTGGTTATCAACC

>VfSat15\_TA  
ATTTTTAAAATAAATTTTTAAAATTTAAATAACACATCATCTTGAATTTCTATTACCTAAGATGACACAATTACTAAGAGTCATTATCTCT  
GATTTTGCAAATTCATAGTAAATCTAGCTTCTTTAAAAGTTTGATAAGTGTGTGCTGTGAATATAATATGTAATGTGATATAACATCA  
CTTTAAAATATATACAAACAATATGAAGATCAATAGAGAAGACAAAACATATTAGTGTGTGCTTTAAAATACTCAAATCTTTAAAAAAA  
TCATTCATATTCTAATGAATCATGCAAAACAAAATAATAATAACACAATATAGAGATATGTTTGTAGAAAAATTAGAATTGTTATTCAA  
ACAAGTTTTATCTTAATATTTACATATACGAGAAAGCAAAAATAAGAAGAAATCTAAGATTATTTGATGCAAAAAGAAATACATACTATTGT  
TATATTTATCATCTTCTTAAGTTTCTCTTTGTGCAAAGTATAACAATGACATGATCAAATTAAGATATGACATAAATCACCTTTATGCT  
GAAAGAGTGTCTTTTTTATGTTGTTTTTCATCATAATATATAGTACCAATTTCTATAATAAGTTTACTACTATAATTTACTACTTTGT  
AAGAGTTATAAGTAGTTAGTTTCTCTAGAACATAACAAGCAGTCACTTTTATGACATCTAGTAAGTGTGTATAAAATTTAAAATTTGATAAAT  
AAATATATTTGCTCAAAAATTTGGGTAACATTAGTTAAAGGTTTTGGCTTTCTTTTTTAAACATTTCAATGTAAGAAATTTAAAATTTAAAC  
TCGTGTAATGCAGGATTATAGAGTTTTGAGAAGTCGTCCATCTGACATTGCTCAAGACCCTACTAATACAACTTTATATACAATATAA  
TTCTTCAAAAAAATATTTTTTTAAAAAAGG

>VfSat16\_TA  
AAGAAGGAAAGGAAAAATTTGAAATAAAACCCACAAACAAGGATAAGATGGTCTTCGAGACCAAGAGAGGGTACATGAGTCGGTTATGC  
AAGGGGAAGGTATTAGCACCCCTCACATTCATCGTACTCGATGGGAACCATTTGGTTCTGTGTGTGTGTTTCGAGTGGTAGTGTGATAGTT  
TGCAATCTTCTACTTATTAATCTTGAAGGAGAAAGAAGTAGGCTTTTTGTTTTTGTGTTGAGTTCGACAAGATTCCGCATCTTGTGT  
CTACGTACTCCCTCGTGCAATGGGAAAGTCGAACTCCGTAGTCTTCTAAAAAAGACCAACGGTGTATTGCTTGAATTTAGAAGAAATGAT  
GAGTTAGACATTTCAAACGTTTGAACCTCGACTTGTTTTGCTCGTTCGCGGAAACTAAGTCTTTGTGTTTGTCTTATTAATGAGTAA  
AAACACATCTCTTTATGAAAAGGTTTTGATGTGCGCAAGGGCGAAAAACAAGTTTGTGAGTTGAAGTTGTTTTATGTTGGGTGATG  
AGTACCGAAAAATCGGACTAACATCTACGACTCAAAATCTAGAAATAGAGGATAAATGAAGCTCAAAGAGTAGTCTCAACCCCAAAA  
GTTATTTTCTTATGAAAAGATGAAGTGAACAAAGTTTACGCTTTATTAGGTTTTGACGAGTCTTAGACAATTTGCTCAACCAACCAAC  
GATCTAAATACTCAAATTTATTATGAAAATGTTTTTGAATAATAAGTTCGACGTTGGATCGAGGATTTGAAACTTTATTATGAAAGTGCT  
TTAGATAGAGAATGGGAGAAAGTCGATTGCGGTTGCAAAAGCAAACTCGACTTATCAAATTAGTTATGAGCTTCGTATGTGGACCAAGAGT  
GCACGAGCTAGATTGATTCAATTAAGTGTTCATAGTGAATAAGCGATTAAAAGCAAAAATAAACTATTAAGCTATTACACGTCCAAATG  
CAGGGATACACTTGTAAATGATGATTGACAAGTAAATCACACAAGCCCATACAAGGTGGCCACACAAATGAAAAGGATAAAGCAAAAAGA  
GATGAATTAATCTTAAGTGCCTAGCAAAGTGGGCTAGTCTTCTAGACGACTAATTAGAATAAATTAACCGACTAGGTCTCACTGTAGG  
AAAGCCAGGATTAAGCTATGAATGTGTGCAAGTGTGCATGTGTTTCGGTGTGGAGGGTCCAAGAGGAAGCCATGCGAGGTCGTTTGCGA  
TGCTTA  
GAAATAAATTGACTTATGGTGGAAAATTTGGCTCGCATTGAGCATTAGTTCTTTGAAAGGTTTCGATGATGATGATGAATGATTAAGG  
TAAAGCAATAAAGTACAATTAATGATTATTACATCACACGGGATTGGGTACAACCTTTTGAATGGGGATGGAACCAACCAAAATCAACCA  
CACACGAAAGCCTAATTAATTAACAATAACAGACCAATTGAACCAAAATAATTAATTAATAAATAAATAATTTTATTTAATATAATTT  
ATTATTAATTAATTAATTAATTAATTAATTAATTAATTAATTAATTAATTAATTAATTAATTAATTAATTAATTAATTAATTAATTAATTA  
AAAAATAAAAAGGAAAGGGACATGGAATAATAAAAACAATGTAGTCCCGCCGAGATTTATTTATTTT

>VfSat17\_TA  
GGTAATTGTATCACACGCTTTTTATTTTAAATAATAAAAAAGTAAGTTTTTCTACTTAACCTAAATTTCTTTTTAAGAAGGAAAGCATA  
CATTTGGTATGTTTGGCAGATGATGCAGGGATGAATATCTTACGTTGAACAATTAATAATGGATTGATTTGTTTTCTTCTAATAACTTC  
TATGTTGTAATTTTTGAAATGTTTCTTATATAAAGAATGAGGATAAATTAAGCTTTTTTATTAATCATGTGACATGCACACATTTGATG  
ATAGGTAACACACAAATTAATGTAATGATATTTTCTTCAAAACCAATCTTTTCTATAATATAGGTATGAGAATGGTGTATCTTT  
TAGCAATGTATCCATTTAAAACACATTAATGATTATATCTCATTTTGTGAAACCTTATCTTTTTTTGTTCAAGAATCATACTAATTTATC  
TAAGAAAAACACTAAGAAGTGGTGGTATCAACAAGTTTTCTAGTGTCCATGTCAATGAAAAAGCACATAAAATGTTATTCTGTATTGATTT  
CAACCTTCACTCGCTTATGTTTAGTAATAGTCTCATTTTTATACTATTTAATTTATTTTTTAAAGTATTCTGGCATCGAATATGTGAAAAATC  
TTACAATTTGACTTTAAAACATGTGACTAAAATTAATTTTATAAATGAACATGCTTTTAAATTTGATAGAGTATGCATCCTCTCAT  
CTTTGCCTAAAAGAAATATCAAGAATGAAAGTTACTATATGAATAAATTA

>VfSat18\_TA  
AAGAATAAATTTAATAAGAATATAAAAAAGAGTTTTTATTTTTAAGACACAATAGGTCACACAATAAGATTTTTTTTTTAAAAGTCATG  
CATATAGAATATATTTAATTTATGTCAAATTTATTGAAGTTATTGATTTTTAGGTATGATAAAAAACAAATTTTATATATGATAACAAT  
TTTTAGCTCTTATTTATATGATAAAACTATATATGCTTATAAATAATTTTTTGGAAATAACTAAAAATTTATTTTTCTTGACCATTTAAGTT  
TACTAAAAAAAATAACACAATTTCTTTACAATTTAAGGACAAAAACACTAATTTTCTAAAGACACTAAATGAATTTTCGACTCCTGCCT

ATCAATCATTCTCTCTTTTTTTAACTGCATTTTGTCTTACCTTTTCATTTTACTCATAAATTTCTCTGCAATTCAAACAAATA  
TCCAAATTTCTTACAAAGTGATTTCTCAAATTTTTAATTCTCATTCAATTAATCTTATCTTAAATTTGGAATCTAAGATTCATCGGAAGT  
ATTCCTTTTGAATCACATTTTATGGTTTTTAGACATAAATTTGTTATTGAATCTACTGCAATTCGCTAAGCTACTTTAAATTAGAACAAT  
GTGGTTTTGGTTTTGATATGATTAAGGTTGTGAGTTAGATGATGCATTTTAGTTATATCTTAAATGTAATGATATTGAATCTTTGAAGATA  
TTGTAATAACTATTATTACCTTACGGGAAAAAGTGACATAAAATTTTATAATAAATGATAACCACTCAAATAGGATTGATATTAATTA  
TGTGTGTGATTAGTTGAAAAAAGTGGTTTATTAAATCAACAATATTTCTTTTCTTTACTATATTACTTGTTTTTAAATATGTAGTT  
TATTAGAAAGTTTATATAAATTAATTTAGTGAGTATGCACATAAATTTAATAATGTTTAATTTTTAAATATTATAAATGTTCAAACATA  
TGTTATGTTTGTATGAACTTGGGATCCAAGAAAAATAGAAAAAGTTAAATAAAATATTGATTTTTTTGTTGATAAATAAATTTTATT  
ACTATATTTTCTTTATTACATAACTAAGTAGTAAAAATGATATATTGAACAAAACCTTTAAAAAATTTATTATTTTTCT

>VfSat19\_TA

TTTTAATAATAGATTTTATTACCAAAATGACATGTGACCATAATTATTGCCAAAAATAACATGTGGCTACGGTTGTCATCATGACTTCTTT  
TAAATTTATGATAAATAGATGCAATTGTAATAATCTTATAATGTAGTAATATTTTTTACATATATTTTAAAGTTGTAGAAACGCACCATAT  
TTGTTTATGCAAAAAAACAATTTCTTGAATATTACCTAACAGATCTTATTTATTGTTACATATTTAATATTGTCATGTATCTTATATA  
TGTTTACATACTTAATATTGTAATGTGTGAAAGTGAGATGTGGGCCGATGAGGGAGAATTCACAACACATTTGTTATTATAGGGATTAG  
GAATATATAAGTTATCCTATTGGGCAGTGTATTGAAAAATTGAACATCGTTAGATTATAAAATAAATAAATATTAAATATGTTATACTTTTA  
TGATGACTTTCTATAAGATTTATATTATAATTATTGTTGTCAAATTTTGTCAATTTCTAAATATTTCTAATTTAATTTAGTGATTTTA  
AATATTATTTAATAGAAATTTTTGTAATAACATATAATTATGTTTTTAAATTTTTAAGAGTTGTAATTTGCATATTTAAGTTTAAATAAA  
AATCATTTAAATCTTTTTAAAGAGTTCAAACCTATTTATAAATCATTTAGGCTTCTATATAAATAGACGACTTTATATTTGTTTATAAT  
AAATTAGTCGATTAAATTTGATATTGAAAGAAAAAGAAAAATATAAAGTTGTTGATTTGTTTTATTAAGAAAAAGCTATAAATAAATTA  
AATTTTTTGGGTATAAATAACAAATAACCATTTCAATTTACTTGTGCAGAATATTTACAAGTTGATTGAATTTGAAGTGATGATAATTGT  
AATGGTTGAAGCCACTTATAAATCTCAAATGACATAAAAAATAAGTTTAAATTTAAATTTAATTTTAAATTAAGATTCTTGGAAATTAAGCT  
GAGGAAAAAATAAGTTACTTGGATTAGTTTATTAAAATAAATTTAATCAATAAATAAATTTATGAACCTTAAAGAAAAATGATAA  
TTATTAATAATATAAATTTTTCCAATTATAACGCAAAATCTATTAACATAAATAAATTTGTCAAAAGAGAAATAAACACAACGTCTT  
TTGCCAACAAAACCTATAAGTTGATATATAGAATAGCTGATAAACCATATTATAAATAAATAAATTTAGTTTATTGAATTTGTTGTA  
TTAATAAATAAATTAAGTTAAGTTAAGTTAATTTTAAATAGTTTTTACTATTATTATTATTATTTA

>VfSat20\_TA

AAACTATAATCTTTCTTTAATTGTGTTGGCTAAAATACACTAATCAATTTGTCATTCATTTTAAATTTGTAATTTAATTTTTATTATCTGA  
AATCTTTTAAATTAATAAATTATTAATAAATTTAATTTATCAAAAAATTTTAAATCAATTAATTTTAACTAATTAATCATCATCCAT  
TGGAAGATTAAGACATATATCACATTTTTTATAAAAAGATTCAAATATGTAAGAAAAAGAATATGAAATAAATTAAGGAGAAAACATGC  
CTTCGATATCTTGCATCTGATTTAAGAATGATTGAACCATATTCATATAGATGTTTCTTTTATTCTTCTATTGCATCCGTTTTTGTCCACA  
TTTTTCTTCAAGTCTCTTTCAACCAATAGATTTCACTGTTAATTTCTCTTCATCAAGTACTAAATCAACTCTTGAAGATGGTCGTTTA  
TAGATAACTAATCCCTTATTTTTTGGCATCTAATTTATTTCTTTTGTGTTTTTCTTCTTTATATAAGATAGTTTATTTATTATAA  
GTCTCATTTTTCTGCCAGTCAAGACTTCTTACATGTAATAAATTTCAAATATTTTCTCTTTTTCAACAAAAGACTAGATCTTTTCAA  
CTTTGCAAAAGGGTTAGCACTTTTATAAAACACATTTATTGATTATAAATTTCTTTCTTCTGATCACAACCTAGAGACAAAATGACAATG  
GAGTAATCTTCTGATAACTTTGCAGAGAATTATTTCAATGGCATGTTACCATGATCAATGGTTCAAATTTGATTTTTCTAAAATGGT  
AGAGATATGAAAAGTCCATTATCATCAATAATGGTCGCAGACACTTATATGCTCTTTGACATATGTTTTATTGCTTCGGAGTTGAAG  
GTTTTGGAGTGAAA

>VfSat21\_TA

CTTTTAGATTTTTAAACGTCAATGATAGCATTAAAAAAACAAGATTTGAGAAAAAGAAAATAAACTTTTGTAAATTTGAAAGTAGACGATG  
ATTCATGGTGGTGGTAGGAAGTCCATGATATGAGAAAAAACTAAAAACATTTATGTGTGAGTGGTACATTATATCATTTAGTACAATCC  
TTTTAATCTAATGGATCTTTTCCATGGTTTATCATGAACATTTAGGTGACGACTAAAATTTTAAATGTCTTTTATCATTATTTTGAATAAA  
TATTTAAATTAATAAATTTTTGACTATCCCTTATAAAGTTGAAGATAATTCATGTCAAATGAGTATCAATAAATTTATTATTATTTTACAA  
ATTATTTATGCTAACTTTTGGATGAGGGTTCAATTTGAATCTCTCATGTCACTAGTGAACAATTCAACTTTACCATAAAAATTAACAAGTC  
TTCATTATATATTTATATACTGTATTAGATTAGATCTTTCCATGCCATCCCTATTTGTATTCTGTAGTGACAAATATGATCACACTAT  
TGTAATCTCTTGCAAAATTTGATTATTATTGTTTTAGAATATCAATCCCATCAGAACAAGCTAAGGCTCTGTTAGTTCCACCACCATAT  
TATTATTTTTATTTACTTTAGACAACAAGTACACGACCTATGATTTTTTTTTGGAATCTAAATCTTTCTTTTATGTTTTTTCAACTATA  
CATTATGACGCTTCTATAAATAACAAAAACATATACTAGTATATTTATTTATTTTTTCTGTTATCTAATTTGCTCTCTCTATTTT  
CATTTGATGTAGTTTTTACCCTAAAGCATTAAAAATAAAAAAGAAAATAGATGCCATAATATCAAATTTCTAAACGTATTATGATAACAAA  
AATGTCAATTTTTTAAAAACAATTTCAAATCATTCAAGATGGATAATGAAATATAAGAGTGACACATTATGAAGTACTTAACATCATT  
CAACCACTCACAAAGCTTGATATAATTTCCCAATCCAAA  
ATTTTTATCAACAACCT

>VfSat22\_TA

GATTATTAAGTACATCCACCTATCTCTTTTAAATGCTTTCTGAGTGGGGGAGATTACTAAGTAGACCCACATATCTGTCAATTTGATGTTTT  
CTCATATTACAAGTTCAATACGAATGATGTTAAATATTATATGTTTTGCCATGTTAACTGCAACATACTTCACTACTGTATATTTCCAG  
TTCATTTACTAAAAAAATCAATTAATAGTCAAATTTTTTCTCTGTTTATATTTTCAAGTAGACGGAATTTATTTCAATTTTAA  
TTAAGATTTTCGCTTTACTTCTTATCTAAAAATCATTAAATTTGTTCTGTTAGCATTATTGGTCCCTCCGTTAACTTTTCTGAAAATTTAT  
AATTTTTGCTAAACATGGCATGCAACTAGGATCTCAGTCGGTAAATATATAAACAATAAATTTGATTTTTATATAAAGCTTGGAGATTGTT  
TTCAGCGGTTAAAAACCCCAAAATTTGTTAATGTGTAAAAAAAGAGACAATTTCTCTTTTCAATTAATAAATAAATTTCTCC  
TTTCAAATTTCAAGCTCTTCAAGTATAACTGCATGTAATATATTATACATAAATAAATTTCTCTTTTCAAATTTAAAAACACTT  
GGAGCTTTAAATACACCAATACATAATTTCAAACAACACATGCAATAATGAAATTTATCAATTTGGTAAATTAATAAAAAATTTGTCATCAA  
GCAGAACAAGCTTGGAGCAGGAGCCTCAACACTTTTCAATTAATGATTTCTTGTACAAAACACTTCAATTAATAACCAAGATTGACATGTTT  
CTTTTCTTAAAAACAACAATAATTAAGTAAACAATAAGTACTACTTTCGCTTGGATTAGTGACAAATAGTTTTCATATTTTACC  
AGCATCCAACATTTGCAACACTGCAATAAAAATCAAATACGCAACACTTAAAGCAATTAACCTCTGTATTACAAATTTGGTAATATGA  
AATTAACTCATAATATATCTAATTTGCTGAAACAATTAATGCAATAAACAGGGTTGCAACCACAACCTTGAACATCTGGTTGAAGGAGAACT  
TTTTTAAACACATCAAACTTAAATTTCCGATTTCTTTTCTTCTCATCTTGTGTTGTTTGAACCTATAATCTTCTGCAACAACCCAAAAC  
AACATAAACTCATAATAAATCAATAAAGAATTTTTTTCTCGATTTGATTGAGGAAACCAAAACCCAAAATTTGCATCAATTTAAAT  
TATCGGAAAAAACCTTAACTTAACTTTTTTTGAAAATTAATAAATTTAAATTTGAAAGTTAAAGAAGATCCAAAATAACTAAT

CCAAACAGCGTTACCAACCACATCAAGGTAAGTAAAAGCAGGAGGAAGATGTAAAAAGAAAACAAATGAAGATGAAGGATGGGAAGCAGG  
TGAAGAGTTTATGGATGAGAATGAAGAGAAAGAGGGTGACGGCTGCTAGGGTCTTGGAAGAAAAGAGAAAAGAAGTTTTTCATAAATATCA  
AAAAAACACGTGATACGTTAAAAATCTATCACTGCCACATATGCAATAATTAACGTTGATTCTTGAAATTTAACGAAAATGACTAAAATA  
ACTAACGGAAAAACATAAAGAAATAAAATAATAAATTAATTAAGAAATTAAGAAATTAAGAAATTAAGTGAATTAAGTGAATAAGAACAATCAATTTTATAG  
AATAAGAATACGTGTTGATTTTTACATTAAAAAAAGTTGGGGAATTTTTCTATTTCAAAAAAGTATTATTAATCTTCATGCTATATTGGC  
TAGAATGGTGGAGA

>VfSat23\_TA

TTGAGAGATTTTCATGAAGGTTTGAATTATTTAGAATGATAATGGTTCATAAAAAAGACATAATTTTGAATTATGTACATGTCTTATTAAG  
TCGGTTAAACGGCCACTTGATTAAACAAGTTTGAACATTTTTTAAATTTCAAATAATTTTTCAAATTTCAAATAGCATCAGGTTTTATTA  
AATCGGTTAATCAGGCCTGGCCATAAAAGTGAACGACCTAACTTAAATATTTCTGGCAGCTTTTTAAAAATCAACTATTTTTATGCCTT  
TATTTCAAAGATTTTTATGCATGACAATTTGAGAATTTATATATGAAAATGTATGAACACTTTGAGCATCTAAAGTTTATACATAATGA  
ATTATAATTGTTTACCTTAGCATCAAGATCAATTTCTTTACTTCCAAAAATATCCATAAGCTTATGCATTCTTGATTCCAAGCTGTTTCT  
TCTTTGACATTTCTTTTTGATAAAATTTGTCTTCTCAAACATAAATTAATAAGATGATGAACATCTTCTTCAATGATTTGATGTC  
AAATTTGATATTAAGTTGATGCTTCTTCAAATCATCTTTCATTCAATGATATTTTTGGAACACTATATCATATGGTGTGATTTTTGA  
AGGATCAATCATGATTTGACAATATTAGCACATGATCTTCAAGTACCTACAAAAAATTAGTAATACTTAGGTACCAATTTTCATTGGGTC  
CTCTTGGGTTAGATACCTTCTCACCCATACATACTCACCATAAGGAATACCATAATTTCTTACGTTGCAGACATTATAAGTATGGTCTTT  
TGCATTACAATAAAAAACAAATAGGTCTAAAAACATGATTCTTTTTATTGACTTAAAAGTTATTTCTATCATAAGGCTTTTTATGATGATTT  
ACAACACGTTTTTTCTTTGAATCCTAATTGTTGAATTTCTTAGTAGCCTTTAGGAAGATAGTTGGACTTGTACTAGGTTTGTCAAAATTA  
AAAATTCAAGTCCAAATTTATTATTTGAAAATATTTGACTACATGATACATTATCCAAGCTAATTTCCCTTTTTTCATATTTTTCAACGAC  
TTGGTTTAATTCCATAATTTTTATTCAAATAAGAACAATTTATGATGCTGAATTTTTTATTAAGTCTAACTCCACTTTTGTGATATTA  
ACCTCACTTTCTAGATTTAAAAATGTTTTATTTCGATTTAAAAATTTCTAAAAAGTTAAAAAATCATCATGTAATTTATTAAGGAC  
TTTGTAAATTCATCATATGAAGGACTATCATCACTTGAGTTGATGTAAGT
